# Supplementary material for: A lateral flow immunoassay method for the rapid detection of acetochlor and alachlor in vegetable oil by sensitivity enhancement by using dimethyl-β-cyclodextrin
Source: Royal Society of Chemistry journal article supplement (doi:10.1039/d3ay01379k), 2023-01-01
Supplement: d3ay01379k1.pdf [file d3ay01379k1.pdf]

## **Electronic Supplementary Information**

### **A lateral flow immunoassay method for the rapid detection of acetochlor and alachlor in vegetable oil by sensitivity enhancement of dimethyl- $\beta$ -cyclodextrin**

**Zepeng Li<sup>a#</sup>, Yuxiang Wu<sup>b#</sup>, Zijing Li<sup>a</sup>, Binger Yu<sup>a</sup>, Xinyi Mao<sup>a</sup> and Guoqing Shi<sup>a\*</sup>**

<sup>a</sup> School of Chemistry and Biological Engineering, University of Science and Technology Beijing,  
Beijing 100083, China

<sup>b</sup> School of Agricultural Engineering and Food Science, Shandong University of Technology, Zibo  
255049, Shandong Province, China

#These authors contribute equally to this work

**\*Corresponding Author:**

G. Shi, E-mail: [shiguoqing@ustb.edu.cn](mailto:shiguoqing@ustb.edu.cn).

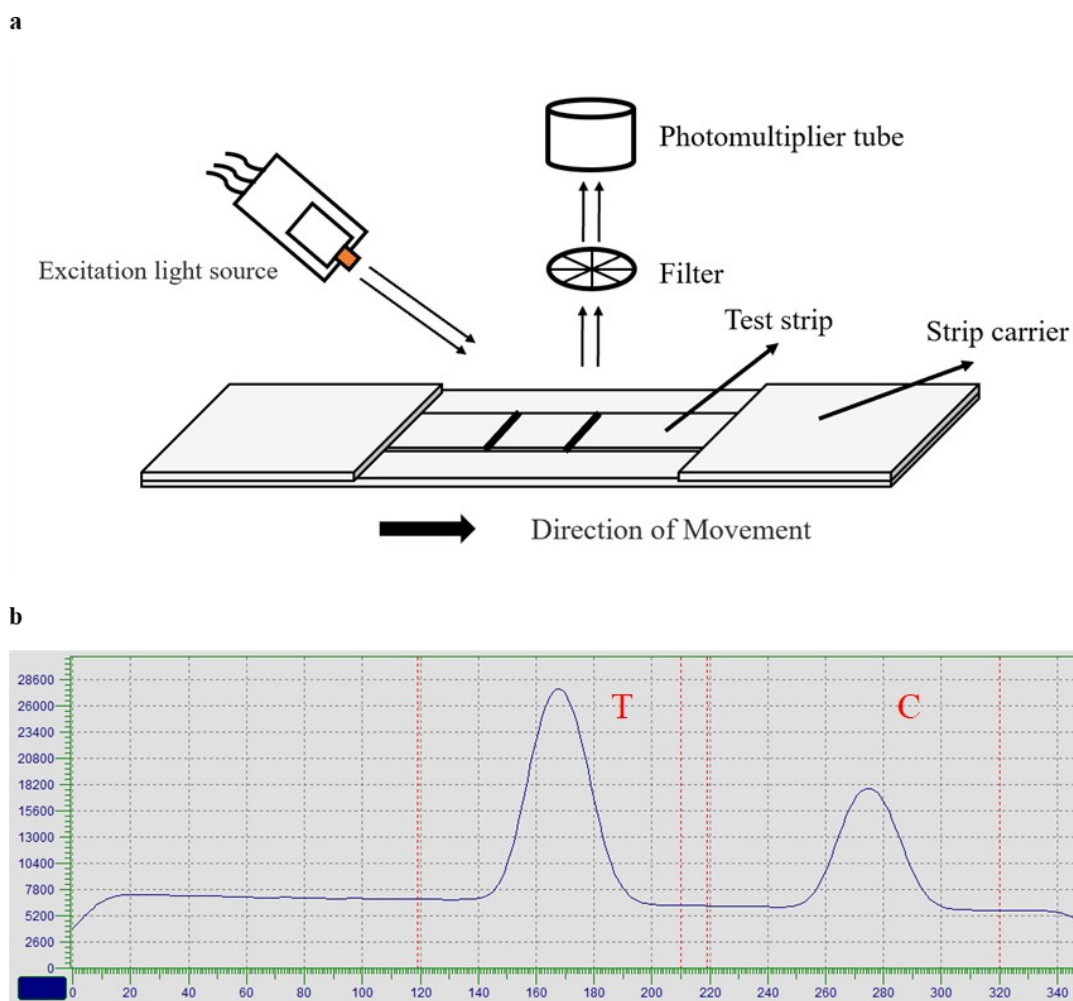

**Fig S1** (a) Diagrammatic sketch of fluorescence intensity scanning on nitrocellulose membrane. With the movement of strip carrier, fluorescence signals emitted from the T and C line were detected. (b) The fluorescence intensity spectra of T line and C line. When the labelled antibody is captured at the T and C lines, the TRF-MS of the corresponding position will be irradiated by an excitation light source at a wavelength of 365 nm and subsequently emit the fluorescent light, which could be captured by the detector at a wavelength of 615 nm. The ordinate is fluorescence intensity and the abscissa is the relative position of T and C lines on the NC membrane.

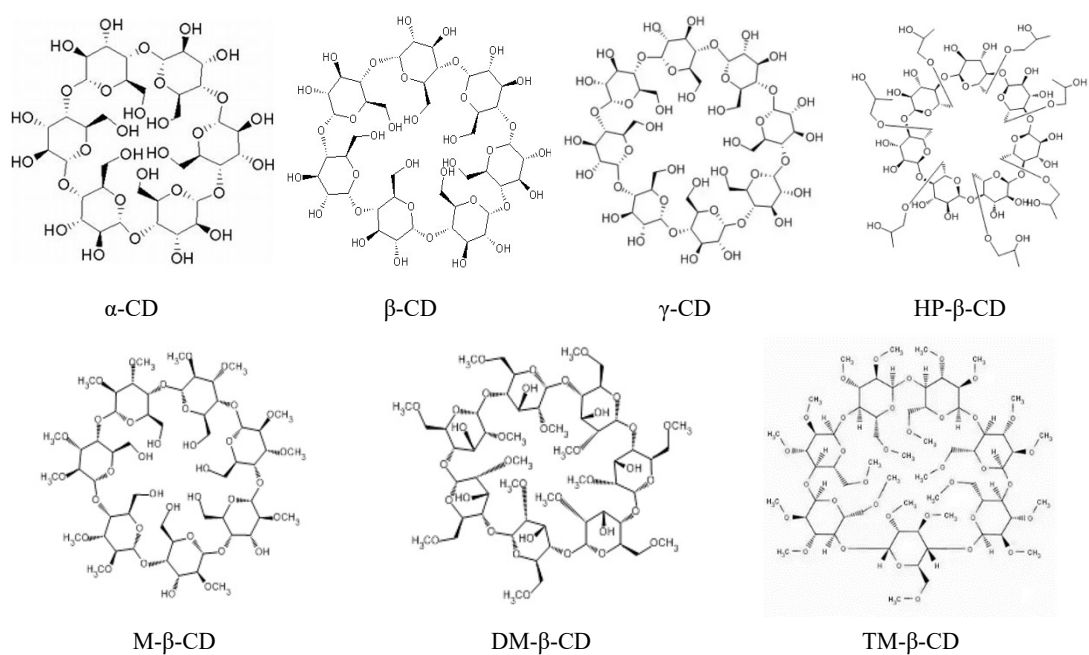

**Fig S2** The structures of cyclodextrin derivatives

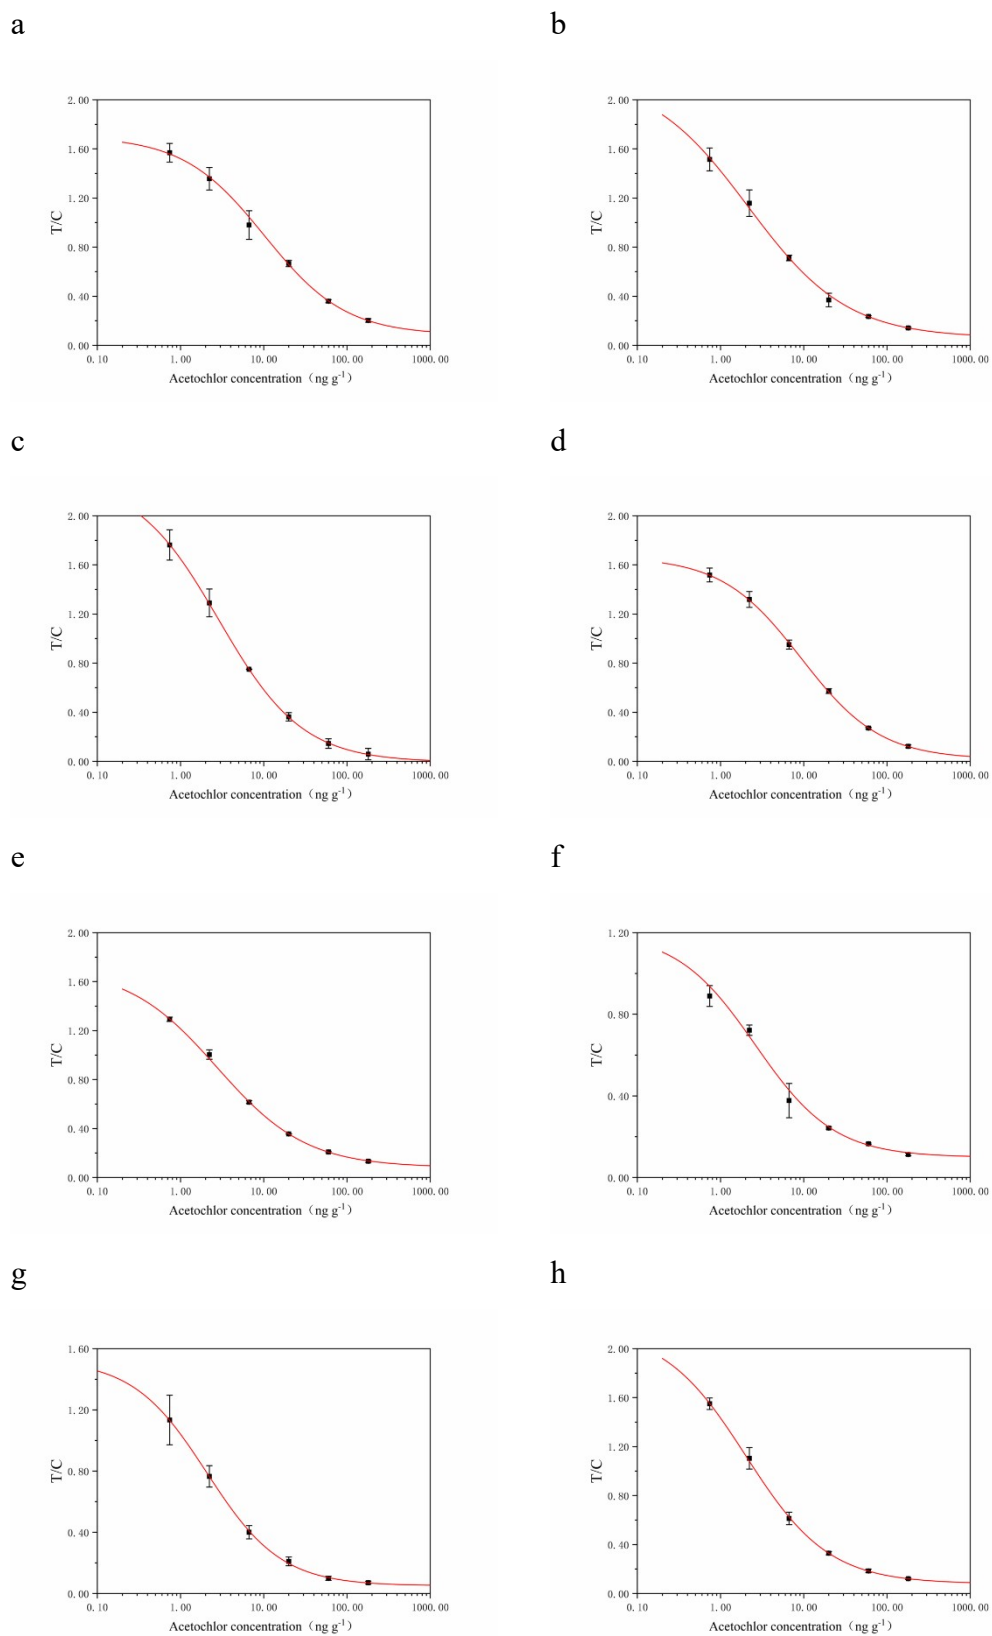

**Fig S3** The working curves for acetochlor in different CDs solutions. (a) Solvent control; (b)  $\alpha$ -CD; (c)  $\beta$ -CD; (d)  $\gamma$ -CD; (e) HP- $\beta$ -CD; (f) M- $\beta$ -CD; (g) DM- $\beta$ -CD; (h) TM- $\beta$ -CD. The standard acetochlor solution (0, 0.74, 2.22, 6.67, 20.00, 60.00 and 180.00 ng g<sup>-1</sup>) were diluted with water (solvent

control) and seven CDs solutions at 5.0 mmol L<sup>-1</sup>.

a

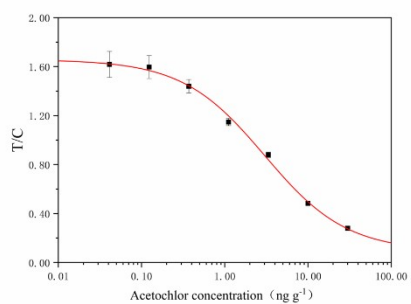

b

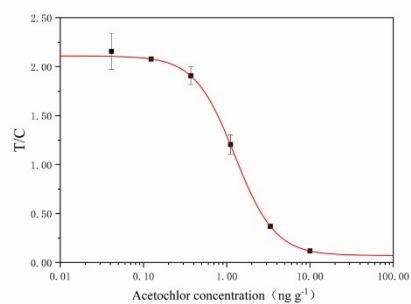

**Fig S4** Effect of DM- $\beta$ -CD on the IC<sub>50</sub> of the LFIA method based on antibody B. (a) Solvent control, the calculated value of IC<sub>50</sub> was 3.53 ng g<sup>-1</sup>; (b) DM- $\beta$ -CD, the calculated value of IC<sub>50</sub> was 1.20 ng g<sup>-1</sup>, DM- $\beta$ -CD improved the sensitivity of antibody B nearly three times. The standard acetochlor solution (0, 0.04, 0.12, 0.37, 1.11, 3.33 and 10.00 ng g<sup>-1</sup>) were diluted with water (solvent control) and DM- $\beta$ -CD solution at 5.0 mmol L<sup>-1</sup>.

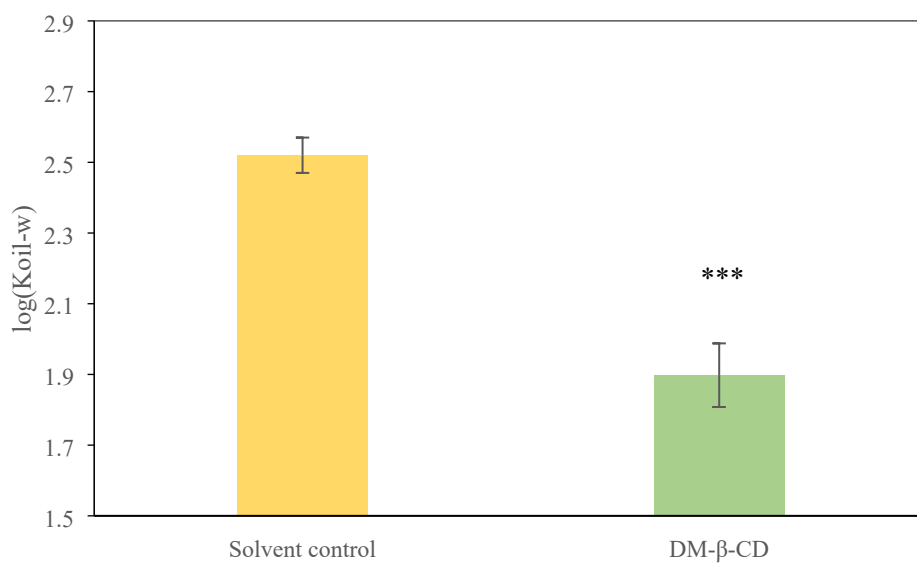

**Fig S5** Effect of DM- $\beta$ -CD on the  $\log(K_{oil-w})$  of alachlor (two-tailed Student's t test; \*\* $P < 0.01$ , \*\*\* $P < 0.001$ , \*\*\*\* $P < 0.0001$ ). The spiked oil samples ( $300 \text{ ng g}^{-1}$ ) were extracted by water and DM- $\beta$ -CD solution ( $5.0 \text{ mmol L}^{-1}$ ) with the W/O ratio of 4, and the vortex time of 90 s, the LFIA method was based on antibody B.

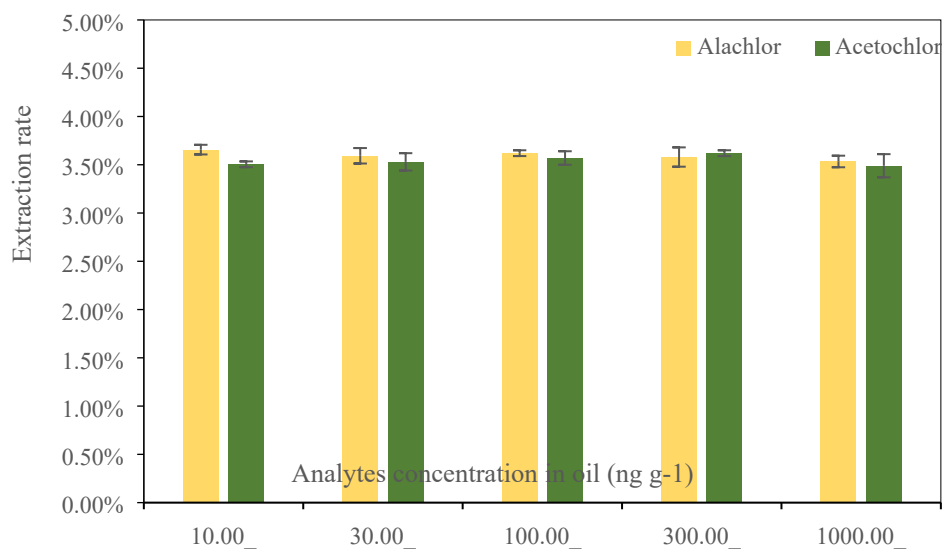

**Fig S6** Extraction rate of different concentrations of alachlor and acetochlor in oil. The spiked oil samples were extracted by optimized procedure (5.0mmol L<sup>-1</sup> of DM- $\beta$ -CD, the W/O ratio of 3 and the vortex time of 90s) and detected by LFIA method which was based on antibody B.

**Table S1** Recoveries of acetochlor and alachlor in oil (n=3, the LFIA method was based on antibody B).

| Oil sample   | Spiked                                          | Detected                            | Recovery (%)    | Detected                          | Recovery (%)    |
|--------------|-------------------------------------------------|-------------------------------------|-----------------|-----------------------------------|-----------------|
|              | acetochlor or<br>alachlor (ng g <sup>-1</sup> ) | acetochlor<br>(ng g <sup>-1</sup> ) |                 | alachlor<br>(ng g <sup>-1</sup> ) |                 |
| Peanut oil   | 0.00                                            | ND <sup>a</sup>                     | NC <sup>b</sup> | ND <sup>a</sup>                   | NC <sup>b</sup> |
|              | 50.00                                           | 48.55                               | 97.10±2.90      | 55.21                             | 110.43±5.94     |
|              | 100.00                                          | 93.95                               | 93.95±1.24      | 103.78                            | 103.78±9.73     |
|              | 300.00                                          | 307.93                              | 102.64±3.19     | 318.19                            | 106.06±5.09     |
| Soybean oil  | 0.00                                            | ND <sup>a</sup>                     | NC <sup>b</sup> | ND <sup>a</sup>                   | NC <sup>b</sup> |
|              | 50.00                                           | 45.85                               | 91.69±1.12      | 55.82                             | 111.65±6.05     |
|              | 100.00                                          | 103.35                              | 103.35±3.21     | 100.02                            | 100.02±7.12     |
|              | 300.00                                          | 295.84                              | 98.61±4.05      | 315.68                            | 105.23±2.79     |
| Corn oil     | 0.00                                            | ND <sup>a</sup>                     | NC <sup>b</sup> | ND <sup>a</sup>                   | NC <sup>b</sup> |
|              | 50.00                                           | 56.78                               | 112.23±2.20     | 46.45                             | 92.90±8.03      |
|              | 100.00                                          | 96.65                               | 96.65±1.55      | 99.98                             | 99.98±3.90      |
|              | 300.00                                          | 303.99                              | 101.33±5.73     | 317.32                            | 105.77±4.01     |
| Rapeseed oil | 0.00                                            | ND <sup>a</sup>                     | NC <sup>b</sup> | ND <sup>a</sup>                   | NC <sup>b</sup> |
|              | 50.00                                           | 46.72                               | 93.43±2.90      | 53.54                             | 107.08±8.02     |
|              | 100.00                                          | 104.97                              | 100.97±2.98     | 108.64                            | 108.64±4.58     |
|              | 300.00                                          | 320.44                              | 106.81±6.34     | 340.59                            | 113.53±3.40     |

<sup>a</sup> Not detected. <sup>b</sup> Not calculated
